# Supplementary material for: Bandgap tuning of a CsPbBr3 perovskite with synergistically improved quality via Sn2+ doping for high-performance carbon-based inorganic perovskite solar cells
Source: Royal Society of Chemistry journal article supplement (doi:10.1039/d2qi00802e), 2022-01-01
Supplement: d2qi00802e1.pdf [file d2qi00802e1.pdf]

# Supporting information

## Bandgap tuning of CsPbBr<sub>3</sub> perovskite with synergistically improved quality via Sn<sup>2+</sup> doping for high-performance carbon-based inorganic perovskite solar cells

Guiqiang Wang<sup>a\*</sup>, Jiayu Bi<sup>a</sup>, Jiarun Chang<sup>a</sup>, Miao Lei<sup>a</sup>, Huiling Zheng<sup>a</sup>, Yu Yan<sup>b</sup>,

<sup>a</sup> College of Chemistry and Materials, Bohai University, Jinzhou 212003, China

<sup>b</sup> Key Laboratory of Physics and Technology for Advanced Batteries, Department of Physics, Jilin University, Changchun 130012, China

\* Corresponding author, wgqiang@bhu.edu.cn (G. Wang)

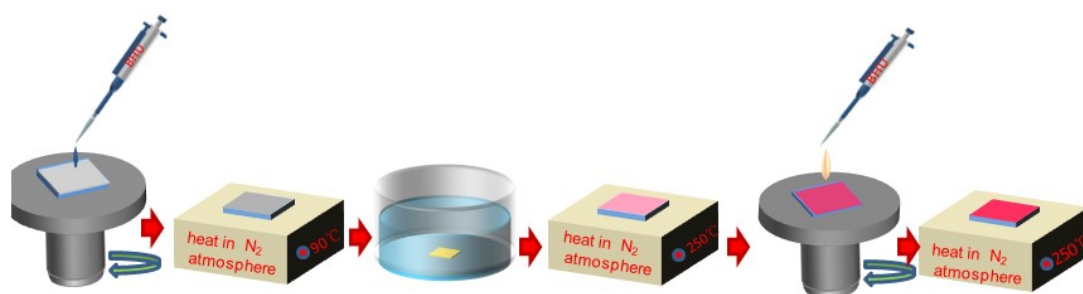

Fig. S1 Schematic illustration of the deposition process of CsPb<sub>1-x</sub>Sn<sub>x</sub>Br<sub>3</sub> perovskite films

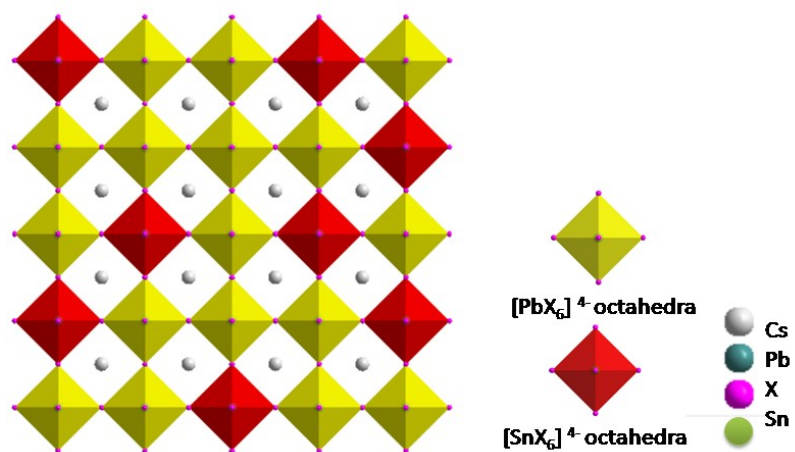

Fig. S2 Crystal structural model of  $\text{CsPb}_{1-x}\text{Sn}_x\text{Br}_3$  perovskite

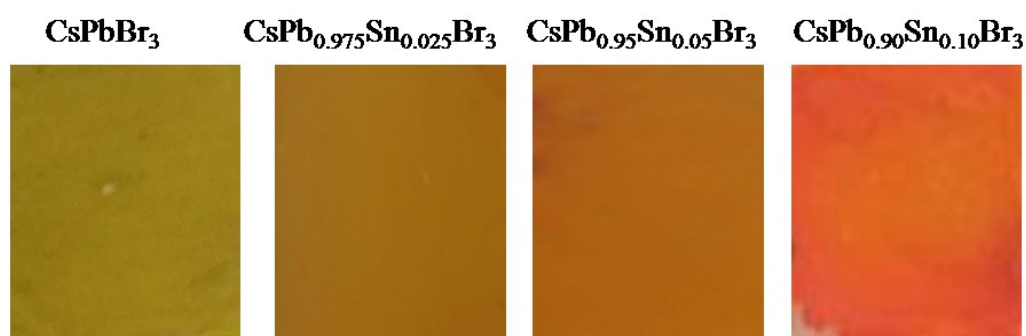

Fig. S3 Optical images of  $\text{CsPb}_{1-x}\text{Sn}_x\text{Br}_3$  perovskite films

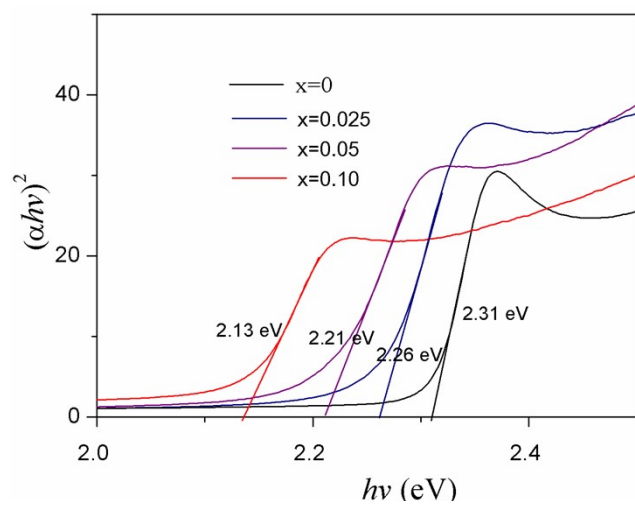

Fig. S4 Tauc plots of  $\text{CsPb}_{1-x}\text{Sn}_x\text{Br}_3$  perovskite films

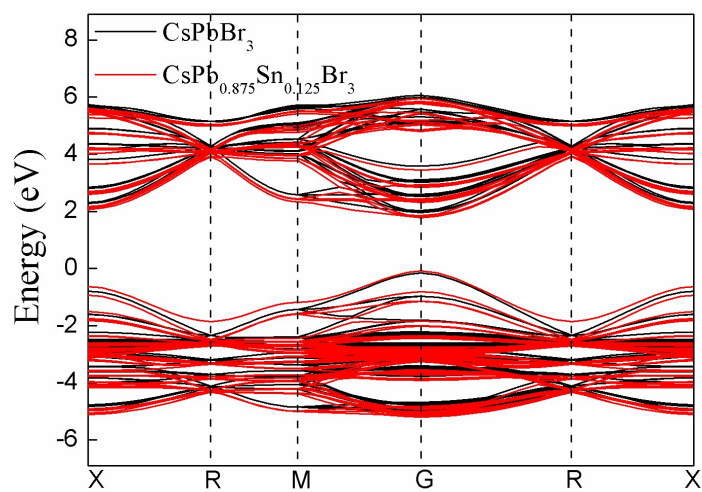

Fig. S5 The calculated band structure of  $\text{CsPbBr}_3$  and  $\text{CsPb}_{0.875}\text{Sn}_{0.125}\text{Br}_3$  perovskites

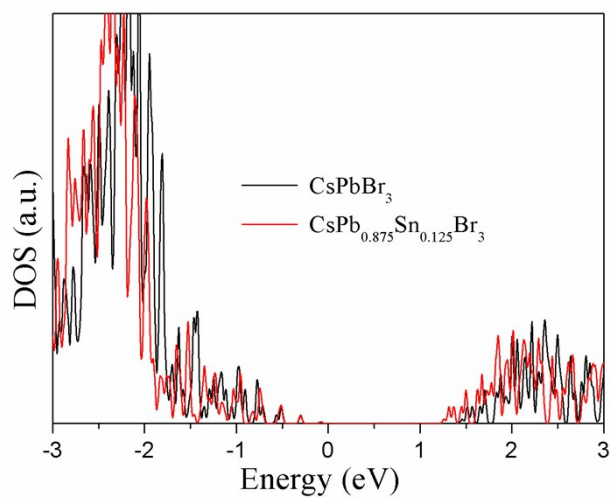

Fig. S6 The calculated total DOS of  $\text{CsPbBr}_3$  and  $\text{CsPb}_{0.875}\text{Sn}_{0.125}\text{Br}_3$  perovskites

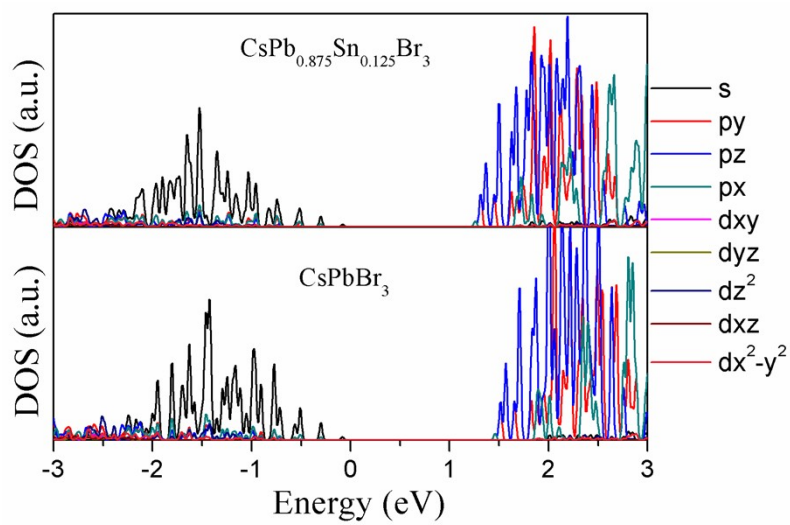

Fig. S7 The calculated DOS of Pb for  $\text{CsPbBr}_3$  and  $\text{CsPb}_{0.875}\text{Sn}_{0.125}\text{Br}$  perovskites

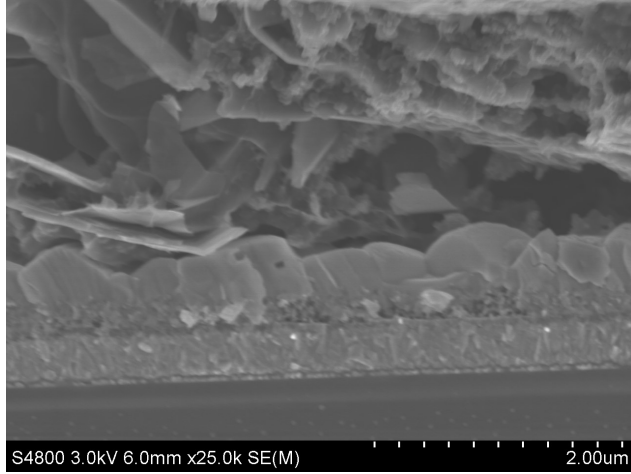

Fig. S8 The cross-sectional SEM image of carbon-based PSC with  $\text{CsPb}_{0.95}\text{Sn}_{0.05}\text{Br}_3$  perovskite film

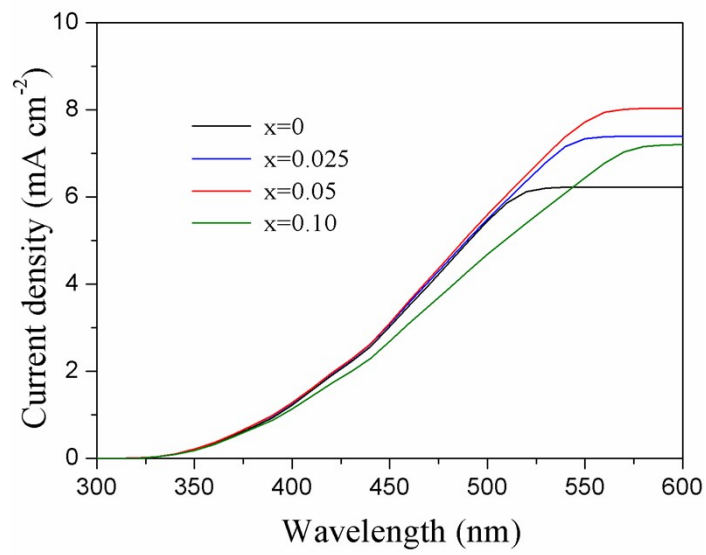

Fig. S9 Integrated current density of PSCs based on  $\text{CsPb}_{1-x}\text{Sn}_x\text{Br}_3$  perovskite films

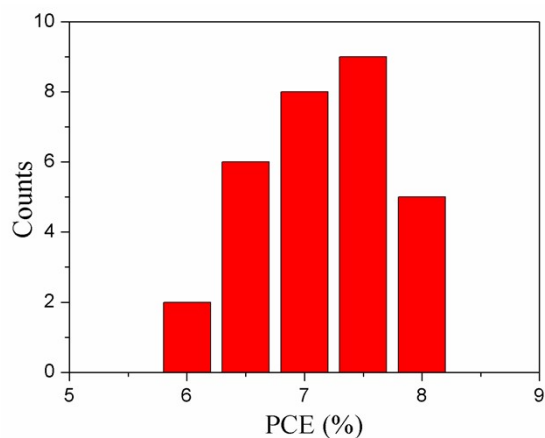

Fig. S10 Statistical efficiency distribution of 30 devices based on  $\text{CsPb}_{0.95}\text{Sn}_{0.05}\text{Br}_3$  perovskite film.

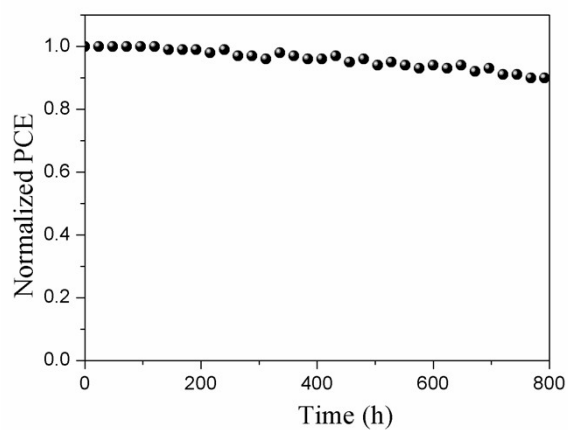

Fig. S11 Normalized PCE of  $\text{CsPbBr}_3$ -based PSC without any encapsulation in ambient condition with a temperature of 30 °C and a relative humidity of 45%.
